# Supplementary material
Source: publisher figshare collection journal article supplement (https://karger.figshare.com/ndownloader/files/35916200)
Supplement: Supplementary file 1 [file 35916200]

**Supplement Table 1.** Associations between the thickness of total retina by each ETDRS sector with gender, age (per decade), and axial length.

| **ETDRS Sector** | **Male vs female** | | | | **Age (per decade), year** | | | | **Axial length, (mm)** | | |
| --- | --- | --- | --- | --- | --- | --- | --- | --- | --- | --- | --- |
| Coefficient | 95% CI | P Value | Coefficient | | 95% CI | P Value | Coefficient | | 95% CI | P Value |
| **Central area** | 7.30 | 2.73,  11.87 | 0.002 | 0.11 | | -1.31,  1.53 | 0.881 | 4.51 | | 1.70,  7.33 | 0.002 |
| **Inner ring** | |  |  |  | |  |  |  | |  |  |
| Inner superior | 8.25 | 4.58,  11.91 | <0.001 | -2.13 | | -3.27,  -0.99 | <0.001 | 0.23 | | -2.03,  2.48 | 0.844 |
| Inner nasal | 8.91 | 4.80,  13.01 | <0.001 | -2.12 | | -3.40,  -0.85 | 0.001 | 0.88 | | -1.64,  3.41 | 0.492 |
| Inner inferior | 8.35 | 4.57,  12.14 | <0.001 | -2.26 | | -3.43,  -1.08 | <0.001 | 0.70 | | -1.63,  3.03 | 0.554 |
| Inner temporal | 8.32 | 4.80,  11.84 | <0.001 | -1.67 | | -2.77,  -0.58 | 0.003 | 1.46 | | -0.71,  3.62 | 0.186 |
| **Outer ring** | |  |  |  | |  |  |  | |  |  |
| Outer superior | 4.94 | 1.40,  8.48 | 0.006 | -2.78 | | -3.88,  -1.69 | <0.001 | -3.65 | | -5.83,  -1.47 | 0.001 |
| Outer nasal | 6.99 | 3.07,  10.91 | 0.001 | -2.92 | | -4.13,  -1.70 | <0.001 | -3.20 | | -5.61,  -0.79 | 0.010 |
| Outer inferior | 4.84 | 1.40,  8.27 | 0.006 | -3.14 | | -4.20,  -2.07 | <0.001 | -3.44 | | -5.56,  -1.33 | 0.002 |
| Outer temporal | 8.58 | 5.40,  11.77 | <0.001 | -2.94 | | -3.93,  -1.96 | <0.001 | -3.14 | | -5.10,  -1.18 | 0.002 |
| *Note: CI = confidence interval, mm = millimeter* | | | | | | | | | | | |
